# Supplementary material
Source: JCI journal article supplement (doi:10.1172/jci194754)

these lanes are shown in the figure panel

Fig. 1F

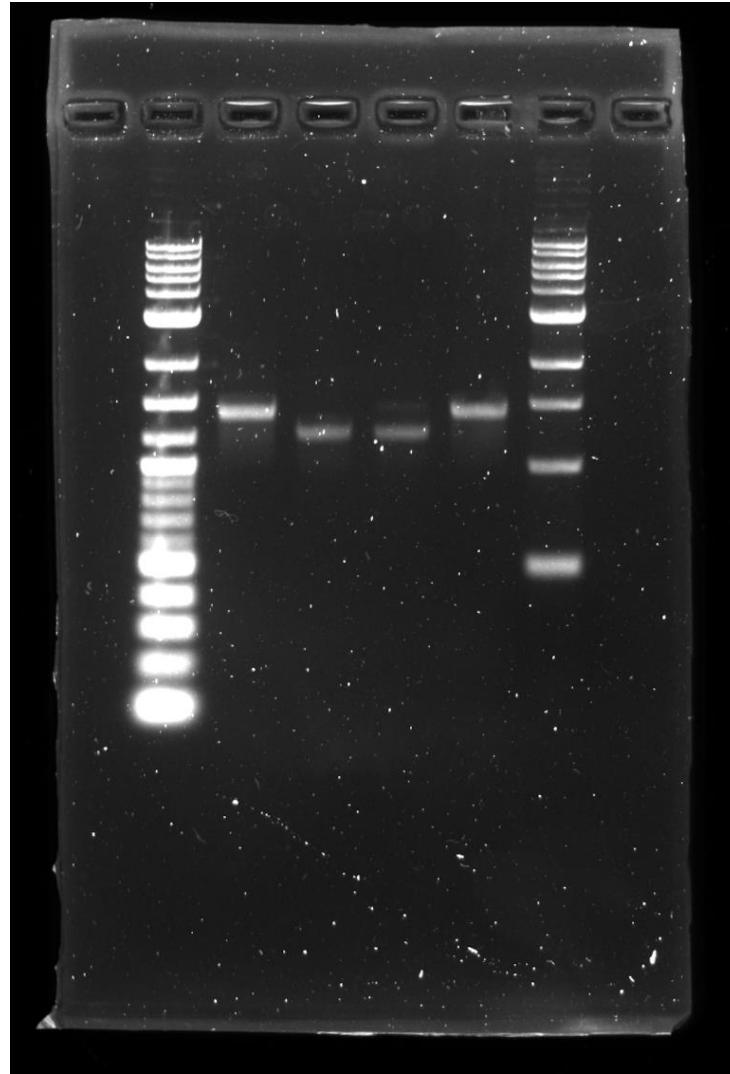

these lanes are shown in the figure panel

Fig. S2B

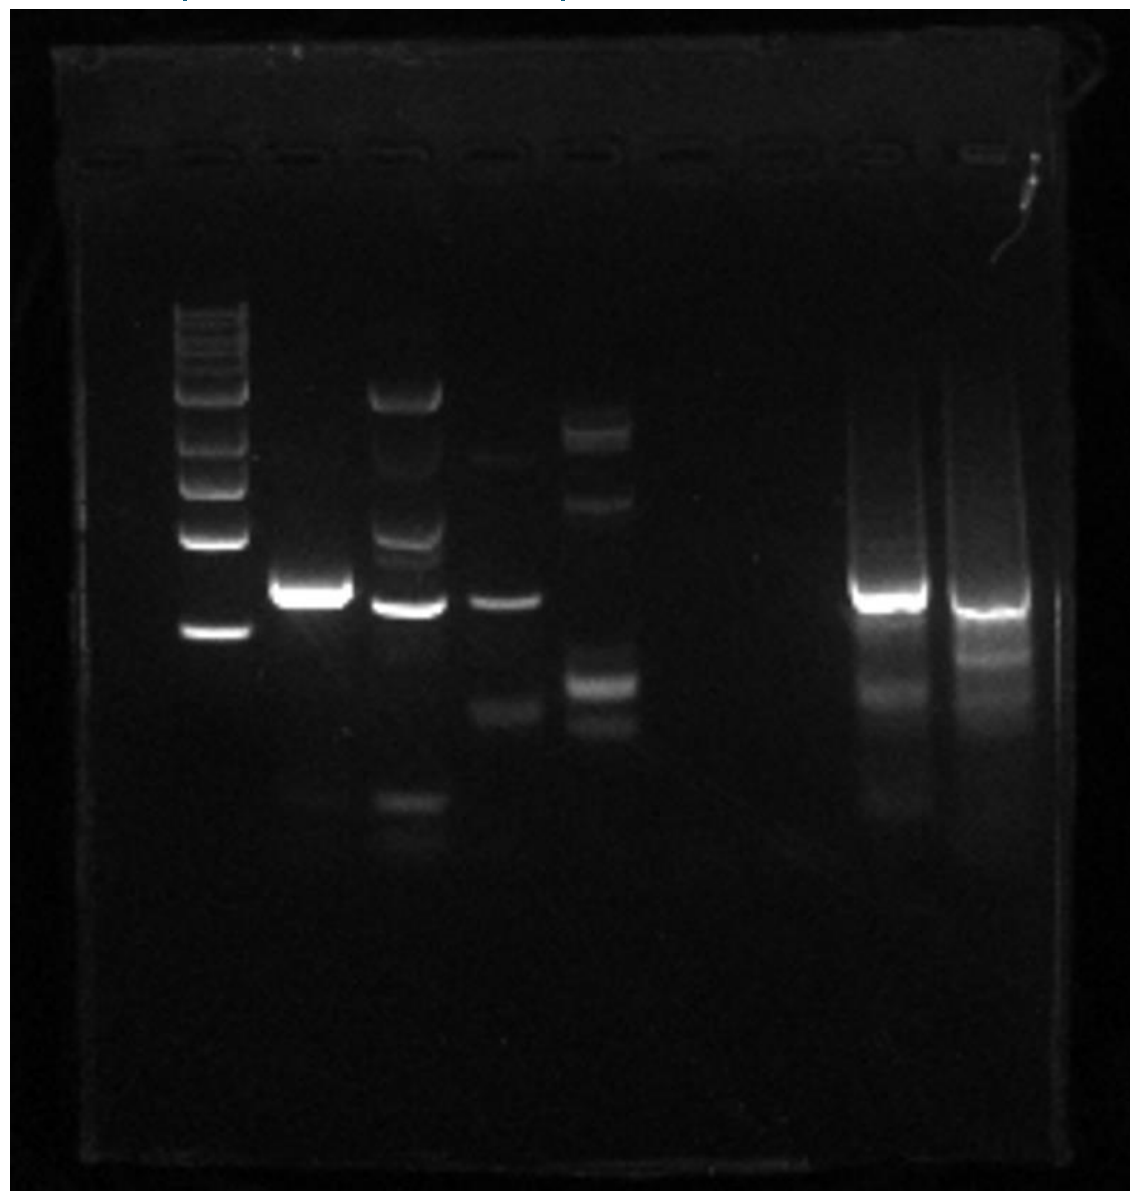

Supplement: sd2 [file 2]
